# Supplementary material
Source: ML conference proceedings conference paper supplement (https://openaccess.thecvf.com/content/WACV2024/html/Wang_Efficient_Transferability_Assessment_WACV_2024_paper.html)
Supplement: Supplementary file 1 [file Wang_Efficient_Transferability_Assessment_WACV_2024_supplemental.pdf]

**Roadmap.** The supplementary material is organized as follows. The details of LogME measurement for object detection are described in A. More details of experiment up in this work are described in Section B. Further, we provide more experimental results regarding the ranking of pre-trained detectors in Section C.

## A. LogME Measurement for Object Detection

In this work, we extend a classification assessment method LogME [14] to object detection. In this section, we will give detailed derivations of LogME for object detection framework.

Different from image-level features used for assessing classification task, we extract object-level features of ground-truth bounding boxes by using pre-trained detectors' backbone followed by an ROIAlign layer [9]. In this way, for a given pre-trained detector and a downstream task, we can collect the object-level features of downstream task by using the detector and form a feature matrix  $\mathbf{F}$ , with each row  $\mathbf{f}_i$  denotes an object-level feature vector. For each  $\mathbf{f}_i$ , we also collect its 4-d coordinates of grounding-truth bounding box  $\mathbf{b}_i$  and class label  $c_i$  to form a bounding box matrix  $\mathbf{B}$  and a class label matrix  $\mathbf{C}$ .

For the bounding box regression sub-task, LogME measures the transferability by using the maximum evidence  $p(\mathbf{B}|\mathbf{F}) = \int p(\boldsymbol{\theta}|\alpha)p(\mathbf{B}|\mathbf{F}, \beta, \boldsymbol{\theta})d\boldsymbol{\theta}$ , where  $\boldsymbol{\theta}$  is the parameter of linear model.  $\alpha$  denotes the parameter of prior distribution of  $\boldsymbol{\theta}$ , and  $\beta$  denotes the parameter of posterior distribution of each observation  $p(\mathbf{b}_i|\mathbf{f}_i, \beta, \boldsymbol{\theta})$ . By using the evidence theory [5] and basic principles in graphical models [6], the evidence can be calculated as

$$\begin{aligned} p(\mathbf{B}|\mathbf{F}) &= \int p(\boldsymbol{\theta}|\alpha)p(\mathbf{B}|\mathbf{F}, \beta, \boldsymbol{\theta})d\boldsymbol{\theta} \\ &= \int p(\boldsymbol{\theta}|\alpha) \prod_{i=1}^M p(\mathbf{b}_i|\mathbf{f}_i, \beta, \boldsymbol{\theta})d\boldsymbol{\theta} \\ &= \left(\frac{\beta}{2\pi}\right)^{\frac{M}{2}} \left(\frac{\alpha}{2\pi}\right)^{\frac{D}{2}} \int e^{-\frac{\alpha}{2}\boldsymbol{\theta}^T\boldsymbol{\theta} - \frac{\beta}{2}\|\mathbf{f}_i\boldsymbol{\theta} - \mathbf{b}_i\|^2} d\boldsymbol{\theta}, \end{aligned} \quad (1)$$

where  $M$  is the number of objects and  $D$  is the dimension of object features. When  $A$  is positive definite,

$$\int e^{-\frac{1}{2}(\boldsymbol{\theta}^T A \boldsymbol{\theta} + \mathbf{b}^T \boldsymbol{\theta} + c)} d\boldsymbol{\theta} = \frac{1}{2} \sqrt{\frac{(2\pi)^D}{|A|}} e^{\frac{1}{4}\mathbf{b}^T A^{-1} \mathbf{b} - c}. \quad (2)$$

LogME takes the logarithm of Eq. (1) for simpler calculation. So the transferability score is expressed by

$$\begin{aligned} \text{LogME} &= \log p(\mathbf{B}|\mathbf{F}) \\ &= \frac{M}{2} \log \beta + \frac{D}{2} \log \alpha - \frac{M}{2} \log 2\pi \\ &\quad - \frac{\beta}{2} \|\mathbf{F}\mathbf{m} - \mathbf{B}\|_2^2 - \frac{\alpha}{2} \mathbf{m}^T \mathbf{m} - \frac{1}{2} \log |A|. \end{aligned} \quad (3)$$

where  $A$  and  $\mathbf{m}$  are

$$A = \alpha I + \beta \mathbf{F}^T \mathbf{F}, \mathbf{m} = \beta A^{-1} \mathbf{F}^T \mathbf{B}, \quad (4)$$

where  $A$  is the  $L_2$ -norm of  $\mathbf{F}$ , and  $\mathbf{m}$  is the solution of  $\boldsymbol{\theta}$ . Here  $\alpha$  and  $\beta$  are maximized by alternating between evaluating  $\mathbf{m}, \gamma$  and maximizing  $\alpha, \beta$  with  $\mathbf{m}, \gamma$  fixed [4] as the following:

$$\gamma = \sum_{i=1}^D \frac{\beta \sigma_i}{\alpha + \beta \sigma_i}, \alpha \leftarrow \frac{\gamma}{\mathbf{m}^T \mathbf{m}}, \beta \leftarrow \frac{M - \gamma}{\|\mathbf{F}\mathbf{m} - \mathbf{B}\|_2^2}, \quad (5)$$

where  $\sigma_i$ 's are singular values of  $\mathbf{F}^T \mathbf{F}$ . With the optimal  $\alpha^*$  and  $\beta^*$ , the logarithm maximum evidence  $\mathcal{L}(\alpha^*, \beta^*)$  is used for evaluating the transferability. Considering  $\mathcal{L}(\alpha^*, \beta^*)$  scales linearly with the number of objects  $M$ , it is normalized as  $\frac{\mathcal{L}(\alpha^*, \beta^*)}{M}$ , which is interpreted as the average logarithm maximum evidence of all given object feature matrix  $\mathbf{F}$  and bounding box matrix  $\mathbf{B}$ . LogME for classification sub-task can be computed by replacing  $\mathbf{B}$  in Eq. (3) with converted one-hot class label matrix.

Nevertheless, optimizing LogME by Eq. (4) and Eq. (5) is timely costly, which is comparable with brute-force fine-tuning. So LogME further improves the computation efficiency as follows. The most expensive steps in Eq. (4) are to calculate the inverse matrix  $A^{-1}$  and matrix multiplication  $A^{-1} \mathbf{F}^T$ , which can be avoided by decomposing  $\mathbf{F}^T \mathbf{F}$ . The decomposition is taken by  $\mathbf{F}^T \mathbf{F} = V \text{diag}\{\sigma\} V^T$ , where  $V$  is an orthogonal matrix. By taking  $\Lambda = \text{diag}\{(\alpha + \beta \sigma)\}$ ,  $A$  and  $A^{-1}$  turn to  $A = \alpha I + \beta \mathbf{F}^T \mathbf{F} = V \Lambda V^T$  and  $A^{-1} = V \Lambda^{-1} V^T$ . With associate law, LogME takes a fast computation by  $A^{-1} \mathbf{F}^T \mathbf{B} = \left( V \left( \Lambda^{-1} \left( V^T \left( \mathbf{F}^T \mathbf{B} \right) \right) \right) \right)$ . To this end, the computation of  $\mathbf{m}$  in Eq. (4) is optimized as

$$\mathbf{m} = \beta \left( V \left( \Lambda^{-1} \left( V^T \left( \mathbf{F}^T \mathbf{B} \right) \right) \right) \right). \quad (6)$$

## B. Details of Experiment Setup

In this section, we include more details of our experiment setup, including the source models and target datasets.

**Implementation Details.** Our implementation is based on MMDetection [1] with PyTorch 1.8 [8] and all experiments are conducted on 8 V100 GPUs. The base feature level  $l_0$  in *Pyramid Feature Matching* is set as 3. The ground truth ranking of these detectors are obtained by fine-tuning all of them on the downstream tasks with well tuned training hyper-parameters. The overall Det-LogME algorithm is given in Algorithm 1.

**Baseline Methods.** We adopt 3 SOTA methods, KNAS [12], SFDA [11], and LogME [14], as the baseline methods and make comparisons with our proposed method. KNAS is a gradient based method different from recent efficient assessment method, we take it as a comparison with our gradient free approach. SFDA is the current SOTA method on

---

**Algorithm 1** Det-LogME
 

---

**Input:** pre-trained detector  $\mathcal{F}$ , target dataset  $\mathcal{D}_t$

**Output:** estimated transferability score Det-LogME

- 1: Extract multi-scale object-level features using pre-trained detector  $\mathcal{F}$ 's backbone followed by an ROIAlign layer and collect bounding box coordinates and class labels:

$$\mathbf{F} \in \mathbb{R}^{M \times D}, \mathbf{B} \in \mathbb{R}^{M \times 4}, \mathbf{C} \in \mathbb{R}^M$$

- 2: Find the match level features for all objects
- 3: Apply center normalization on  $\mathbf{B}$  to obtain  $\mathbf{B}^{cen}$
- 4: Unify  $\mathbf{B}^{cen}$  and  $\mathbf{C}$  as a unified label matrix  $\mathbf{Y}^u$  by

$$\mathbf{Y}^u = \left[ \begin{array}{c} \underbrace{(0, 0, 0, 0)}_{1\text{st}}, \dots, \underbrace{(x_c, y_c, w_c, h_c)}_{c_i\text{-th}}, \dots, \underbrace{(0, 0, 0, 0)}_{K\text{-th}} \end{array} \right]_{M}^{\mathbf{b}_i^{cen}}$$

- 5: Initialize  $\alpha = 1, \beta = 1$ , compute  $\mathbf{F}^T \mathbf{F} = V \text{diag}\{\sigma\} V^T$
- 6: **while**  $\alpha$  and  $\beta$  not converge **do**

- 7:   Compute  $\gamma = \sum_{i=1}^D \frac{\beta \sigma_i}{\alpha + \beta \sigma_i}, \Lambda = \text{diag}\{(\alpha + \beta \sigma)\}$

- 8:   Compute  $\mathbf{m} = \beta (V (\Lambda^{-1} (V^T (\mathbf{F}^T \mathbf{B}^{cen}))))$

- 9:   Expand  $\mathbf{m} \in \mathbb{R}^D$  to  $\mathbf{m} \in \mathbb{R}^{D \times (4 \cdot K)}$  for matching  $\mathbf{Y}^u$

- 10:   Update  $\alpha \leftarrow \frac{\gamma}{\mathbf{m}^T \mathbf{m}}, \beta \leftarrow \frac{M - \gamma}{\|\mathbf{F} \mathbf{m} - \mathbf{B}^{cen}\|_2^2}$

- 11: **end while**

- 12: Compute U-LogME by

$$\begin{aligned} \text{U-LogME} &= \frac{M}{2} \log \beta + \frac{D}{2} \log \alpha - \frac{M}{2} \log 2\pi \\ &\quad - \frac{\beta}{2} \|\mathbf{F} \mathbf{m} - \mathbf{B}^{cen}\|_2^2 - \frac{\alpha}{2} \mathbf{m}^T \mathbf{m} - \frac{1}{2} \log |A|, \end{aligned}$$

where  $A = \alpha I + \beta \mathbf{F}^T \mathbf{F}$

- 13: Downsample  $\mathbf{m}$  to  $\mathbf{m}' \in \mathbb{R}^{D \times 4}$  by reserving the real coordinates of  $\mathbf{B}^{cen}$ , compute IoU-LogME =  $\frac{|\mathbf{F} \mathbf{m}' \cap \mathbf{B}^{cen}|}{|\mathbf{F} \mathbf{m}' \cup \mathbf{B}^{cen}|}$

- 14: Compute Det-LogME = U-LogME +  $\mu \cdot \text{IoU-LogME}$

- 15: **Return** Det-LogME
- 

the classification task, so we formulate the multi-class object detection as a object-level classification task for adapting SFDA. LogME is the baseline of our work. Here, we describe the details for adapting these methods for object detection task.

**KNAS** is originally used for Neural Architecture Search (NAS) under a gradient kernel hypothesis. This hypothesis indicates that assuming  $\mathcal{G}$  is a set of all the gradients, there exists a gradient  $\mathbf{g}$  which infers the downstream training performance. We adopt it as a gradient based approach to compare with our gradient free approach. Under this hypothesis, taking MSE loss for bounding box regression as an example, KNAS aims to minimize

$$\mathcal{L}(w) = \frac{1}{2} \left\| \hat{\mathbf{B}} - \mathbf{B} \right\|_2^2, \quad (7)$$

where  $w$  is the trainable weights,  $\hat{\mathbf{B}} = [\hat{b}_1, \dots, \hat{b}_M]^T$  is the bounding box prediction matrix,  $\mathbf{B} = [b_1, \dots, b_M]^T$  is the ground truth bounding box matrix, and  $M$  is the number of objects. Then gradient descent is applied to optimize the

model weights:

$$\Theta(t+1) = \Theta(t) - \eta \frac{\partial \mathcal{L}(\Theta(t))}{\partial \Theta(t)}, \quad (8)$$

where  $t$  represents the  $t$ -th iteration and  $\eta$  is the learning rate. The gradient for an object sample  $i$  is

$$\frac{\partial \mathcal{L}(\Theta(t), i)}{\partial \Theta(t)} = \left( \hat{\mathbf{b}}_i - \mathbf{b}_i \right) \frac{\partial \hat{\mathbf{b}}_i}{\partial \Theta(t)}. \quad (9)$$

Then, a Gram matrix  $\mathbf{H}$  is defined where the entry  $(i, j)$  is

$$\mathbf{H}_{i,j}(t) = \left( \frac{\partial \hat{\mathbf{b}}_j(t)}{\partial \Theta(t)} \right) \left( \frac{\partial \hat{\mathbf{b}}_i(t)}{\partial \Theta(t)} \right)^T. \quad (10)$$

$\mathbf{H}_{i,j}(t)$  is the dot-product between two gradient vectors  $\mathbf{g}_i = \frac{\partial \hat{\mathbf{b}}_i(t)}{\partial \Theta(t)}$  and  $\mathbf{g}_j = \frac{\partial \hat{\mathbf{b}}_j(t)}{\partial \Theta(t)}$ . To this end, the gradient kernel  $\mathbf{g}$  can be computed as the mean of all elements in the Gram matrix  $\mathbf{H}$ :

$$\mathbf{g} = \frac{1}{M^2} \sum_{i=1}^M \sum_{j=1}^M \left( \frac{\partial \hat{\mathbf{b}}_j(t)}{\partial \Theta(t)} \right) \left( \frac{\partial \hat{\mathbf{b}}_i(t)}{\partial \Theta(t)} \right)^T. \quad (11)$$

As the length of the whole gradient vector is too long, Eq. (11) is approximated by

$$\mathbf{g} = \frac{1}{Q M^2} \sum_{q=1}^Q \sum_{i=1}^M \sum_{j=1}^M \left( \frac{\partial \hat{\mathbf{b}}_j(t)}{\partial \hat{\Theta}^q(t)} \right) \left( \frac{\partial \hat{\mathbf{b}}_i(t)}{\partial \hat{\Theta}^q(t)} \right)^T. \quad (12)$$

where  $Q$  is the number of layers in the detection head, and  $\hat{\Theta}^q$  is the sampled parameters from  $q$ -th layer and the length of  $\hat{\Theta}^q$  is set as 1000 in our implementation. The obtained gradient kernel  $\mathbf{g}$  is regarded as the transferability score from KNAS.

**SFDA** is specially designed to assess the transferability for classification tasks, which is not applicable for single-class detection datasets used in this work including SKU-110K [3], WIDER FACE [13], and CrowdHuman [10]. It aims to leverage the neglected fine-tuning dynamics for transferability evaluation, which degrades the efficiency. Given object-level feature matrix  $\mathbf{F} = [\mathbf{f}_1, \dots, \mathbf{f}_M]^T$ , with corresponding class label matrix  $\mathbf{C}$ , we consider object detection as an object-level multi-class classification task for adapting SFDA.

To utilize the fine-tuning dynamics, SFDA transforms the object feature matrix  $\mathbf{F}$  to a space with good class separation under Regularized Fisher Discriminant Analysis (Reg-FDA). A transformation is defined to project  $\mathbf{F} \in \mathbb{R}^{M \times D}$  to  $\tilde{\mathbf{F}} \in \mathbb{R}^{M \times D'}$  by a projection matrix  $\mathbf{U} \in \mathbb{R}^{D \times D'}$  with  $\tilde{\mathbf{F}} := \mathbf{U}^T \mathbf{F}$ . The project matrix is

$$\mathbf{U} = \arg \max_{\mathbf{U}} \frac{d_b(\mathbf{U})}{d_w(\mathbf{U})} \stackrel{\text{def}}{=} \frac{|\mathbf{U}^T \mathbf{S}_b \mathbf{U}|}{|\mathbf{U}^T [(1-\lambda) \mathbf{S}_w + \lambda \mathbf{I}] \mathbf{U}|}, \quad (13)$$

Table 1. Ranking results of six methods for 1% 33-choose-22 possible source model sets (over 1.9M) on 6 downstream target datasets. Higher  $\rho_w$  and Recall@1 indicate better ranking and transferability metric. As SFDA is specifically designed for classification task, it is not applicable for the single-class task of CrowdHuman. The results of all three variants of our approach, U-LogME, IoU-LogME, and Det-LogME are reported. The best methods are in red and good ones are in blue.

| Measure Method | Weighted Pearson's Coefficient ( $\rho_w$ ) |                  |            |                  |                  |                  | Recall@1         |           |                  |                  |                  |                  |
|----------------|---------------------------------------------|------------------|------------|------------------|------------------|------------------|------------------|-----------|------------------|------------------|------------------|------------------|
|                | KNAS                                        | SFDA             | LogME      | U-LogME          | IoU-LogME        | Det-LogME        | KNAS             | SFDA      | LogME            | U-LogME          | IoU-LogME        | Det-LogME        |
| Pascal VOC     | 0.01±0.15                                   | <b>0.71±0.14</b> | -0.04±0.16 | -0.07±0.23       | <b>0.73±0.13</b> | 0.68±0.12        | 0.26±0.44        | 0.33±0.47 | <b>0.53±0.50</b> | 0.20±0.40        | 0.34±0.47        | <b>0.41±0.49</b> |
| CityScapes     | 0.15±0.18                                   | 0.46±0.11        | 0.38±0.09  | 0.19±0.13        | <b>0.53±0.10</b> | <b>0.55±0.09</b> | <b>0.53±0.50</b> | 0.00±0.00 | <b>0.53±0.50</b> | 0.12±0.33        | <b>0.53±0.50</b> | <b>0.53±0.50</b> |
| SODA           | -0.11±0.21                                  | 0.60±0.13        | 0.28±0.13  | 0.12±0.13        | <b>0.65±0.12</b> | <b>0.66±0.11</b> | 0.00±0.00        | 0.00±0.00 | <b>0.53±0.50</b> | 0.12±0.33        | <b>0.53±0.50</b> | <b>0.53±0.50</b> |
| CrowdHuman     | -0.21±0.13                                  | N/A              | 0.08±0.19  | 0.11±0.17        | <b>0.31±0.08</b> | <b>0.30±0.08</b> | 0.00±0.00        | N/A       | <b>0.65±0.48</b> | 0.58±0.49        | <b>0.65±0.48</b> | <b>0.65±0.48</b> |
| VisDrone       | 0.15±0.21                                   | 0.29±0.15        | 0.35±0.10  | 0.12±0.10        | <b>0.44±0.12</b> | <b>0.44±0.11</b> | 0.12±0.32        | 0.34±0.47 | 0.17±0.38        | 0.01±0.11        | <b>0.25±0.43</b> | <b>0.25±0.43</b> |
| DeepLesion     | 0.08±0.18                                   | -0.37±0.29       | 0.34±0.20  | <b>0.54±0.19</b> | -0.17±0.34       | <b>0.50±0.16</b> | 0.01±0.09        | 0.00±0.00 | 0.26±0.44        | <b>0.57±0.50</b> | 0.00±0.03        | <b>0.42±0.49</b> |
| Average        | 0.01±0.18                                   | 0.34±0.16        | 0.23±0.15  | 0.20±0.16        | <b>0.42±0.15</b> | <b>0.52±0.11</b> | 0.15±0.36        | 0.11±0.31 | <b>0.44±0.50</b> | 0.27±0.44        | 0.38±0.49        | <b>0.46±0.50</b> |

Table 2. The transferability scores obtained from 6 metrics and fine-tuning mAP on Pascal VOC and CityScapes datasets. The last row is the corresponding ranking correlation  $\tau_w$  for every metric.

| Model           | Backbone   | Pascal VOC |       |        |         |           |             |      | CityScapes |       |        |         |           |             |      |
|-----------------|------------|------------|-------|--------|---------|-----------|-------------|------|------------|-------|--------|---------|-----------|-------------|------|
|                 |            | KNAS       | SFDA  | LogME  | U-LogME | IoU-LogME | Det-LogME   | mAP  | KNAS       | SFDA  | LogME  | U-LogME | IoU-LogME | Det-LogME   | mAP  |
| Faster RCNN     | R50        | 2.326E-01  | 0.791 | -6.193 | -3.223  | 0.482     | 1.199       | 84.5 | -2.093E+00 | 0.879 | -6.257 | -1.518  | 0.624     | 9.229       | 41.9 |
|                 | R101       | 1.095E-01  | 0.809 | -6.177 | -3.160  | 0.492     | 1.258       | 84.5 | -1.791E+00 | 0.887 | -6.258 | -1.478  | 0.624     | 9.289       | 42.3 |
|                 | X101-32x4d | -4.396E-02 | 0.822 | -6.146 | -2.969  | 0.505     | 1.380       | 85.2 | -2.386E+00 | 0.892 | -6.269 | -1.397  | 0.622     | 9.242       | 43.5 |
|                 | X101-64x4d | 9.018E-01  | 0.825 | -6.129 | -2.944  | 0.509     | 1.405       | 85.6 | -1.664E+00 | 0.894 | -6.270 | -1.381  | 0.624     | 9.353       | 42.8 |
| Cascade RCNN    | R50        | -6.438E-01 | 0.795 | -6.232 | -3.203  | 0.481     | 1.206       | 84.1 | -6.218E+00 | 0.874 | -6.286 | -1.514  | 0.618     | 9.013       | 44.1 |
|                 | R101       | -2.226E-01 | 0.811 | -6.222 | -3.176  | 0.490     | 1.247       | 84.9 | -6.553E+00 | 0.883 | -6.289 | -1.489  | 0.621     | 9.127       | 43.7 |
|                 | X101-32x4d | -6.405E-01 | 0.826 | -6.194 | -3.024  | 0.503     | 1.351       | 85.6 | -5.763E+00 | 0.891 | -6.297 | -1.415  | 0.620     | 9.160       | 44.1 |
|                 | X101-64x4d | 1.270E+00  | 0.831 | -6.190 | -3.006  | 0.505     | 1.367       | 85.8 | -5.182E+00 | 0.891 | -6.290 | -1.402  | 0.620     | 9.166       | 45.4 |
| Dynamic RCNN    | R50        | -8.148E-03 | 0.791 | -6.206 | -2.875  | 0.483     | 1.343       | 84.0 | 1.878E-01  | 0.869 | -6.303 | -1.352  | 0.617     | 9.110       | 42.5 |
| RegNet          | 400MF      | 5.056E-01  | 0.750 | -6.162 | -3.387  | 0.465     | 1.076       | 83.3 | 2.401E-01  | 0.845 | -6.264 | -1.647  | 0.606     | 8.400       | 39.9 |
|                 | 800MF      | 6.691E-02  | 0.758 | -6.156 | -3.295  | 0.468     | 1.122       | 83.9 | -2.308E+00 | 0.855 | -6.279 | -1.606  | 0.606     | 8.441       | 40.3 |
|                 | 1.6GF      | 1.523E-01  | 0.770 | -6.162 | -3.232  | 0.472     | 1.161       | 84.6 | -1.504E+00 | 0.869 | -6.279 | -1.553  | 0.613     | 8.767       | 41.8 |
|                 | 3.2GF      | 6.241E-02  | 0.786 | -6.170 | -3.186  | 0.482     | 1.215       | 85.5 | -3.148E-01 | 0.877 | -6.269 | -1.527  | 0.618     | 8.984       | 42.7 |
|                 | 4GF        | 3.995E-01  | 0.790 | -6.166 | -3.133  | 0.484     | 1.242       | 85.0 | -1.451E+00 | 0.878 | -6.278 | -1.506  | 0.617     | 8.956       | 43.1 |
| DCN             | R50        | 3.852E-02  | 0.825 | -6.122 | -2.748  | 0.511     | 1.490       | 86.1 | -6.647E-01 | 0.889 | -6.246 | -1.267  | 0.625     | 9.497       | 42.6 |
|                 | R101       | -9.254E-02 | 0.836 | -6.155 | -2.812  | 0.516     | 1.481       | 86.5 | -2.072E+00 | 0.894 | -6.253 | -1.298  | 0.626     | 9.503       | 43.1 |
|                 | X101-32x4d | 7.048E-02  | 0.846 | -6.100 | -2.653  | 0.525     | 1.577       | 86.9 | -7.308E-01 | 0.899 | -6.253 | -1.227  | 0.626     | 9.571       | 43.5 |
| FCOS            | R50        | 1.023E+01  | 0.289 | -6.093 | -1.856  | 0.264     | 0.988       | 77.3 | 6.343E+00  | 0.492 | -6.434 | -0.992  | 0.491     | 4.318       | 40.4 |
|                 | R101       | 5.233E+00  | 0.280 | -6.032 | -2.101  | 0.262     | 0.884       | 79.4 | 5.277E+00  | 0.515 | -6.426 | -1.124  | 0.491     | 4.219       | 41.2 |
| RetinaNet       | R18        | -3.404E-01 | 0.733 | -6.289 | -2.928  | 0.442     | 1.177       | 80.9 | 1.157E-02  | 0.844 | -6.411 | -1.438  | 0.597     | 8.206       | 36.7 |
|                 | R50        | -1.357E-01 | 0.759 | -6.277 | -2.975  | 0.457     | 1.213       | 84.1 | 5.439E-03  | 0.867 | -6.370 | -1.388  | 0.606     | 8.609       | 40.0 |
|                 | R101       | -1.807E-01 | 0.774 | -6.259 | -2.972  | 0.467     | 1.246       | 84.4 | 4.709E-02  | 0.879 | -6.357 | -1.374  | 0.612     | 8.854       | 40.6 |
|                 | X101-32x4d | -1.030E-01 | 0.792 | -6.260 | -2.763  | 0.475     | 1.360       | 84.6 | 2.935E-02  | 0.881 | -6.377 | -1.308  | 0.608     | 8.762       | 41.2 |
|                 | X101-64x4d | -3.170E-01 | 0.792 | -6.229 | -2.722  | 0.475     | 1.376       | 85.3 | 2.304E-02  | 0.886 | -6.366 | -1.276  | 0.610     | 8.858       | 42.0 |
| Sparse RCNN     | R50        | 9.846E+03  | 0.777 | -6.267 | -3.243  | 0.456     | 1.102       | 84.7 | -1.640E+04 | 0.878 | -6.414 | -1.595  | 0.602     | 8.304       | 38.9 |
|                 | R101       | -2.104E+04 | 0.795 | -6.238 | -3.263  | 0.466     | 1.127       | 85.0 | 1.198E+04  | 0.884 | -6.396 | -1.601  | 0.602     | 8.304       | 39.3 |
| Deformable DETR | R50        | 8.873E+03  | 0.794 | -5.221 | -2.295  | 0.462     | 1.501       | 87.0 | 1.363E+05  | 0.881 | -5.376 | -1.065  | 0.673     | 11.602      | 45.5 |
| Faster RCNN OI  | R50        | 2.038E+00  | 0.724 | -6.016 | -4.100  | 0.443     | 0.716       | 82.2 | 3.288E+00  | 0.837 | -6.260 | -1.951  | 0.602     | 7.982       | 39.3 |
| RetinaNet OI    | R50        | -2.045E-01 | 0.697 | -6.195 | -3.335  | 0.430     | 0.974       | 82.0 | 1.701E-01  | 0.845 | -6.343 | -1.624  | 0.600     | 8.177       | 39.5 |
| SoCo            | R50        | -3.222E+00 | 0.703 | -6.094 | -3.062  | 0.433     | 1.093       | 56.5 | 4.629E+01  | 0.836 | -6.237 | -1.473  | 0.606     | 8.536       | 41.7 |
| InsLoc          | R50        | -3.153E-03 | 0.566 | -6.239 | -1.592  | 0.424     | 1.649       | 86.7 | 1.041E-02  | 0.756 | -6.322 | -0.738  | 0.582     | 8.191       | 40.3 |
| UP-DETR         | R50        | 8.225E+02  | 0.175 | -6.267 | -3.086  | 0.238     | 0.404       | 59.3 | -2.994E+02 | 0.399 | -6.485 | -1.404  | 0.403     | 0.455       | 30.9 |
| DETRReg         | R50        | -6.832E+02 | 0.189 | -5.999 | -3.872  | 0.248     | 0.129       | 63.5 | -9.335E+02 | 0.427 | -5.892 | -1.958  | 0.440     | 1.462       | 38.7 |
| $\tau_w$        |            | 0.15       | 0.64  | 0.22   | 0.43    | 0.54      | <b>0.79</b> | N/A  | -0.02      | 0.51  | 0.32   | 0.18    | 0.68      | <b>0.71</b> | N/A  |

where  $d_b(U)$  and  $d_w(U)$  represent between scatter of classes and within scatter of each class,  $\lambda \in [0, 1]$  is a regularization coefficient for a trade-off between the inter-class separation and intra-class compactness, and  $I$  is an identity matrix. The between and within scatter matrix  $S_b$  and  $S_w$  are defined as

$$S_b = \sum_{c=1}^K M_c (\nu_c - \nu) (\nu_c - \nu)^\top$$

$$S_w = \sum_{c=1}^K \sum_{i=1}^{M_c} (\mathbf{f}_i^{(c)} - \nu_c) (\mathbf{f}_i^{(c)} - \nu_c)^\top, \quad (14)$$

where  $\nu = \sum_{i=1}^M \mathbf{f}_i$  and  $\nu_c = \sum_{i=1}^{M_c} \mathbf{f}_i^{(c)}$  are the mean of all and  $c$ -th class object features.

With the intuition that a model with Infomin requires stronger supervision for minimizing within scatter of every class which results in better classes separation.  $\lambda$  is instantiated by  $\lambda = \exp^{-a\sigma(S_w)}$ , where  $a$  is a positive constant and  $\sigma(S_w)$  is the largest eigenvalue of  $S_w$ . For every class, SFDA assumes  $\tilde{\mathbf{f}}_i^{(c)} \sim \mathcal{N}(U^\top \nu_c, \Sigma_c)$ , where  $\Sigma_c$  is the covariance matrix of  $\{\tilde{\mathbf{f}}_i^{(c)}\}_{i=1}^{M_c}$ . With projection matrix  $U$ , the score function for class  $c$  is

$$\delta_c(\mathbf{f}_i) = \mathbf{f}_i^\top U U^\top \nu_c - \frac{1}{2} \nu_c^\top U U^\top \nu_c + \log \frac{M_c}{M}. \quad (15)$$

Then, the final class prediction probability is obtained by

Table 3. The transferability scores obtained from 6 metrics and fine-tuning mAP on SODA and CrowdHuman datasets. The last row is the corresponding ranking correlation  $\tau_w$  for every metric.

| Model           | Backbone   | SODA       |           |        |         |             |           |        | CrowdHuman |           |        |         |             |             |       |
|-----------------|------------|------------|-----------|--------|---------|-------------|-----------|--------|------------|-----------|--------|---------|-------------|-------------|-------|
|                 |            | KNAS       | SFDA      | LogME  | U-LogME | IoU-LogME   | Det-LogME | mAP    | KNAS       | SFDA      | LogME  | U-LogME | IoU-LogME   | Det-LogME   | mAP   |
| Faster RCNN     | R50        | -1.314E+00 | 0.831     | -5.698 | -2.148  | 0.542       | 16.546    | 34.7   | -1.216E+01 | N/A       | -6.660 | -0.116  | 0.575       | 1.357       | 41.4  |
|                 | R101       | -2.636E+00 | 0.846     | -5.679 | -2.071  | 0.548       | 17.121    | 35.0   | -1.648E+01 | N/A       | -6.655 | -0.111  | 0.577       | 1.482       | 41.3  |
|                 | X101-32x4d | -2.516E+00 | 0.852     | -5.664 | -1.924  | 0.554       | 17.643    | 35.7   | -7.494E+00 | N/A       | -6.620 | -0.074  | 0.586       | 2.081       | 41.2  |
|                 | X101-64x4d | -1.226E+00 | 0.856     | -5.660 | -1.914  | 0.557       | 17.900    | 36.4   | -9.416E+00 | N/A       | -6.596 | -0.045  | 0.592       | 2.460       | 41.5  |
| Cascade RCNN    | R50        | -9.109E+00 | 0.826     | -5.746 | -2.129  | 0.537       | 16.183    | 35.3   | -1.958E+01 | N/A       | -6.681 | -0.138  | 0.568       | 0.851       | 43.0  |
|                 | R101       | -1.177E+01 | 0.836     | -5.733 | -2.091  | 0.543       | 16.685    | 35.9   | -2.723E+01 | N/A       | -6.683 | -0.143  | 0.567       | 0.781       | 42.8  |
|                 | X101-32x4d | -1.509E+01 | 0.846     | -5.709 | -1.966  | 0.549       | 17.245    | 36.8   | -1.755E+01 | N/A       | -6.662 | -0.126  | 0.573       | 1.170       | 43.2  |
|                 | X101-64x4d | -1.277E+01 | 0.851     | -5.733 | -1.946  | 0.552       | 17.453    | 37.4   | -1.083E+01 | N/A       | -6.660 | -0.121  | 0.573       | 1.225       | 43.7  |
| Dynamic RCNN    | R50        | -1.597E+00 | 0.820     | -5.758 | -1.871  | 0.535       | 16.169    | 35.2   | -5.448E+00 | N/A       | -6.674 | -0.130  | 0.568       | 0.900       | 41.8  |
|                 | 400MF      | -1.900E+00 | 0.785     | -5.670 | -2.300  | 0.520       | 14.767    | 32.5   | -1.393E+01 | N/A       | -6.628 | -0.099  | 0.579       | 1.619       | 38.0  |
| RegNet          | 800MF      | -1.512E+00 | 0.803     | -5.694 | -2.239  | 0.525       | 15.206    | 34.2   | -8.908E+00 | N/A       | -6.636 | -0.099  | 0.578       | 1.546       | 39.8  |
|                 | 1.6GF      | -2.576E+00 | 0.815     | -5.668 | -2.169  | 0.537       | 16.190    | 35.7   | -1.558E+01 | N/A       | -6.653 | -0.118  | 0.573       | 1.215       | 41.8  |
|                 | 3.2GF      | -2.007E+00 | 0.827     | -5.682 | -2.140  | 0.538       | 16.288    | 37.0   | -1.560E+01 | N/A       | -6.647 | -0.106  | 0.577       | 1.438       | 41.7  |
|                 | 4GF        | -1.735E+00 | 0.826     | -5.700 | -2.097  | 0.539       | 16.380    | 37.0   | -1.600E+01 | N/A       | -6.650 | -0.111  | 0.576       | 1.388       | 41.9  |
| DCN             | R50        | -1.077E+00 | 0.844     | -5.677 | -1.736  | 0.553       | 17.632    | 32.5   | -1.393E+01 | N/A       | -6.569 | -0.013  | 0.602       | 3.121       | 43.1  |
|                 | R101       | -8.408E-01 | 0.846     | -5.669 | -1.786  | 0.556       | 17.874    | 35.3   | -1.073E+01 | N/A       | -6.584 | -0.033  | 0.596       | 2.718       | 43.4  |
|                 | X101-32x4d | -1.797E+00 | 0.859     | -5.676 | -1.655  | 0.559       | 18.189    | 36.0   | -7.181E+00 | N/A       | -6.494 | 0.018   | 0.614       | 3.876       | 44.3  |
| FCOS            | R50        | -1.287E-02 | 0.510     | -5.729 | -1.328  | 0.415       | 6.902     | 33.3   | -1.263E+00 | N/A       | -6.578 | -0.040  | 0.570       | 1.046       | 35.6  |
|                 | R101       | 6.980E-01  | 0.541     | -5.688 | -1.535  | 0.413       | 6.610     | 34.5   | -1.601E+00 | N/A       | -6.537 | -0.006  | 0.578       | 1.593       | 36.8  |
| RetinaNet       | R18        | -2.071E-02 | 0.778     | -5.846 | -1.988  | 0.510       | 14.099    | 29.6   | 3.133E-02  | N/A       | -6.696 | -0.161  | 0.554       | 0.008       | 35.8  |
|                 | R50        | -7.809E-01 | 0.818     | -5.817 | -1.885  | 0.527       | 15.528    | 33.9   | 3.080E-02  | N/A       | -6.702 | -0.168  | 0.555       | 0.035       | 38.3  |
|                 | R101       | -1.857E-02 | 0.828     | -5.835 | -1.874  | 0.532       | 15.877    | 34.0   | -1.330E-03 | N/A       | -6.699 | -0.164  | 0.556       | 0.121       | 38.6  |
|                 | X101-32x4d | -1.033E-01 | 0.833     | -5.864 | -1.794  | 0.530       | 15.766    | 34.2   | -4.154E-03 | N/A       | -6.691 | -0.157  | 0.557       | 0.171       | 38.9  |
|                 | X101-64x4d | -2.995E-01 | 0.839     | -5.851 | -1.717  | 0.537       | 16.430    | 35.6   | 8.897E-03  | N/A       | -6.676 | -0.147  | 0.562       | 0.477       | 39.9  |
| Sparse RCNN     | R50        | -5.855E+04 | 0.824     | -5.892 | -2.256  | 0.518       | 14.636    | 35.9   | 4.174E+04  | N/A       | -6.683 | -0.154  | 0.554       | 0.009       | 38.6  |
|                 | R101       | -1.934E+05 | 0.833     | -5.869 | -2.255  | 0.523       | 14.991    | 36.3   | -1.077E+03 | N/A       | -6.676 | -0.145  | 0.557       | 0.190       | 39.2  |
| Deformable DETR | R50        | -9.691E+04 | 0.820     | -4.557 | -1.421  | 0.589       | 20.697    | 38.8   | -3.523E+04 | N/A       | -5.447 | 0.904   | 0.790       | 15.536      | 45.3  |
| Faster RCNN OI  | R50        | -2.170E+01 | 0.767     | -5.543 | -2.756  | 0.513       | 13.942    | 32.8   | -6.768E+01 | N/A       | -6.533 | -0.006  | 0.601       | 3.037       | 40.0  |
| RetinaNet OI    | R50        | -2.793E-01 | 0.780     | -5.782 | -2.278  | 0.507       | 13.741    | 33.4   | 7.107E-03  | N/A       | -6.650 | -0.104  | 0.571       | 1.077       | 38.5  |
| SoCo            | R50        | -5.681E-01 | 0.759     | -5.584 | -2.074  | 0.517       | 14.607    | 33.2   | -1.681E+01 | N/A       | -6.553 | 0.019   | 0.601       | 3.065       | 40.6  |
|                 | InsLoc     | R50        | 1.857E-02 | 0.691  | -5.750  | -0.842      | 0.490     | 13.092 | 31.4       | 7.323E-01 | N/A    | -6.652  | -0.117      | 0.565       | 0.690 |
| UP-DETR         | R50        | -4.658E+02 | 0.457     | -6.040 | -1.946  | 0.338       | 0.423     | 20.1   | 3.661E+02  | N/A       | -6.613 | -0.145  | 0.555       | 0.062       | 35.4  |
| DETRReg         | R50        | -8.563E+02 | 0.467     | -5.584 | -2.477  | 0.371       | 2.783     | 24.3   | -6.686E+02 | N/A       | -6.202 | 0.221   | 0.638       | 5.498       | 41.0  |
| $\tau_w$        |            | -0.44      | 0.43      | 0.22   | 0.03    | <b>0.66</b> | 0.65      | N/A    | -0.47      | N/A       | 0.37   | 0.39    | <b>0.51</b> | <b>0.51</b> | N/A   |

normalizing  $\{\delta_c(\mathbf{f}_i)\}_K$  with softmax function:

$$p(c_i | \mathbf{f}_i) = \frac{\exp^{\delta_{c_i}(\mathbf{f}_i)}}{\sum_{c=1}^K \exp^{\delta_c(\mathbf{f}_i)}} \quad (16)$$

To this end, the transferability score is expressed as the mean of  $p(c_i | \mathbf{f}_i)$  over all object samples by

$$p(C | \mathbf{F}) = \frac{1}{M} \sum_{i=1}^M \frac{\exp^{\delta_{c_i}(\mathbf{f}_i)}}{\sum_{c=1}^K \exp^{\delta_c(\mathbf{f}_i)}}. \quad (17)$$

LogME is following Eq. (3) described in Sec. A.

## C. More Experimental Results

**Ranking Performance.** Except for Weighted Kendall’s tau ( $\tau_w$ ) and Top-1 Relative Accuracy (Rel@1), we also evaluate the transferability metrics based on Weighted Pearson’s coefficient ( $\rho_w$ ) [2] and Recall@1 [7], as shown in Table 1. Weighted Pearson’s coefficient is used to measure the linear correlation between transferability scores and ground truth fine-tuning performance. Recall@1 is used to measure the ratio of successfully selecting the model with best fine-tuning performance. The evaluation is conducted on 1% 33-choose-22 possible source model sets (over 1.9M). Regarding  $\rho_w$ , we can draw the conclusion that Det-LogME outperforms all three SOTA methods consistently on 6 downstream tasks by a large margin. The IoU based metric

IoU-LogME also performs well on 5 datasets. Regarding Recall@1, our proposed Det-LogME outperforms previous SOTA methods in average.

**Detailed Ranking Results.** We provide detailed raw ranking results of all 33 pre-trained detectors on 6 downstream tasks, including the transferability scores, ground truth performance (the average result of 3 runs with very light variance), and *Weighted Kendall’s tau*  $\tau_w$ . The results are provided in the following tables. Table 2 shows results on Pascal VOC and CityScapes, Table 3 shows results on SODA and CrowdHuman, and Table 4 contains results on VisDrone and DeepLesion.

## References

- [1] Kai Chen, Jiaqi Wang, Jiangmiao Pang, Yuhang Cao, Yu Xiong, Xiaoxiao Li, Shuyang Sun, Wansen Feng, Ziwei Liu, Jiarui Xu, et al. Mmdetection: Open mmlab detection toolbox and benchmark. *arXiv preprint arXiv:1906.07155*, 2019. 1
- [2] David Freedman, Robert Pisani, and Roger Purves. Statistics (international student edition). *Pisani, R. Purves, 4th edn. WW Norton & Company, New York*, 2007. 4
- [3] Eran Goldman, Roi Herzig, Aviv Eisenschat, Jacob Goldberger, and Tal Hassner. Precise detection in densely packed scenes. In *Proceedings of the IEEE/CVF Conference on Computer Vision and Pattern Recognition*, pages 5227–5236, 2019. 2

Table 4. The transferability scores obtained from 6 metrics and fine-tuning mAP on VisDrone and DeepLesion datasets. The last row is the corresponding ranking correlation  $\tau_w$  for every metric.

| Model           | Backbone   | VisDrone   |       |        |         |             |             |      | DeepLesion |       |        |             |           |           |     |
|-----------------|------------|------------|-------|--------|---------|-------------|-------------|------|------------|-------|--------|-------------|-----------|-----------|-----|
|                 |            | KNAS       | SFDA  | LogME  | U-LogME | IoU-LogME   | Det-LogME   | mAP  | KNAS       | SFDA  | LogME  | U-LogME     | IoU-LogME | Det-LogME | mAP |
| Faster RCNN     | R50        | 3.634E-01  | 0.645 | -6.611 | -1.771  | 0.432       | 1.357       | 21.3 | 6.270E-01  | 0.665 | -4.858 | -3.203      | 0.394     | 1.114     | 2.9 |
|                 | R101       | -3.928E-01 | 0.662 | -6.608 | -1.734  | 0.438       | 1.482       | 21.5 | 6.524E-01  | 0.675 | -4.801 | -3.118      | 0.396     | 1.129     | 2.8 |
|                 | X101-32x4d | -1.176E+00 | 0.661 | -6.551 | -1.648  | 0.442       | 2.081       | 22.3 | 4.738E-01  | 0.691 | -4.774 | -2.838      | 0.392     | 1.137     | 3.0 |
|                 | X101-64x4d | -5.828E-01 | 0.669 | -6.527 | -1.636  | 0.443       | 2.460       | 23.2 | 3.634E-01  | 0.682 | -4.778 | -2.967      | 0.386     | 1.107     | 3.7 |
| Cascade RCNN    | R50        | -8.062E-01 | 0.637 | -6.652 | -1.775  | 0.427       | 0.851       | 20.7 | -1.159E+00 | 0.662 | -4.795 | -3.041      | 0.387     | 1.102     | 3.1 |
|                 | R101       | -2.153E+00 | 0.645 | -6.649 | -1.764  | 0.428       | 0.781       | 21.4 | -1.697E+00 | 0.674 | -4.752 | -3.295      | 0.392     | 1.100     | 3.1 |
|                 | X101-32x4d | -2.963E+00 | 0.659 | -6.607 | -1.687  | 0.436       | 1.170       | 21.9 | -7.776E-01 | 0.685 | -4.717 | -2.981      | 0.395     | 1.133     | 3.6 |
|                 | X101-64x4d | -4.002E+00 | 0.662 | -6.600 | -1.670  | 0.438       | 1.225       | 22.5 | -1.154E+00 | 0.678 | -4.667 | -3.202      | 0.385     | 1.083     | 3.0 |
| Dynamic RCNN    | R50        | 1.827E-01  | 0.639 | -6.629 | -1.650  | 0.433       | 0.900       | 16.1 | 9.446E-01  | 0.652 | -4.712 | -1.752      | 0.396     | 1.237     | 3.0 |
| RegNet          | 400MF      | -9.387E-01 | 0.609 | -6.497 | -1.902  | 0.433       | 1.619       | 19.2 | 7.476E-01  | 0.660 | -4.826 | -2.895      | 0.392     | 1.131     | 2.8 |
|                 | 800MF      | -6.771E-01 | 0.631 | -6.552 | -1.860  | 0.437       | 1.546       | 21.1 | 1.511E-01  | 0.641 | -4.871 | -2.528      | 0.392     | 1.162     | 2.9 |
|                 | 1.6GF      | -2.191E-01 | 0.646 | -6.588 | -1.831  | 0.438       | 1.215       | 22.2 | 5.915E-01  | 0.666 | -4.770 | -2.723      | 0.403     | 1.183     | 3.1 |
|                 | 3.2GF      | -1.319E+00 | 0.657 | -6.584 | -1.801  | 0.442       | 1.438       | 23.3 | 4.484E-01  | 0.658 | -4.790 | -2.486      | 0.397     | 1.182     | 3.3 |
|                 | 4GF        | -2.118E+00 | 0.654 | -6.572 | -1.785  | 0.442       | 1.388       | 23.2 | 1.133E+00  | 0.642 | -4.833 | -2.539      | 0.396     | 1.173     | 2.8 |
| DCN             | R50        | -1.394E+00 | 0.654 | -6.513 | -1.582  | 0.447       | 3.121       | 21.7 | 3.988E-01  | 0.705 | -4.570 | -2.418      | 0.425     | 1.282     | 2.7 |
|                 | R101       | -1.431E+00 | 0.666 | -6.529 | -1.623  | 0.447       | 2.718       | 21.9 | -7.920E-01 | 0.707 | -4.602 | -2.527      | 0.431     | 1.293     | 3.0 |
|                 | X101-32x4d | -3.897E-01 | 0.677 | -6.397 | -1.537  | 0.458       | 3.876       | 23.3 | 3.103E-01  | 0.698 | -4.573 | -2.023      | 0.421     | 1.300     | 3.5 |
| FCOS            | R50        | 5.389E+00  | 0.476 | -6.523 | -1.362  | 0.393       | 1.046       | 21.6 | -5.430E+00 | 0.254 | -4.747 | 6.207       | 0.295     | 1.542     | 4.5 |
|                 | R101       | 5.258E+00  | 0.493 | -6.448 | -1.474  | 0.396       | 1.593       | 22.4 | -6.504E+00 | 0.202 | -4.352 | 5.016       | 0.283     | 1.405     | 4.8 |
| RetinaNet       | R18        | -4.476E-02 | 0.603 | -6.687 | -1.712  | 0.419       | 0.008       | 14.7 | -4.071E-02 | 0.525 | -4.836 | -1.504      | 0.410     | 1.306     | 2.8 |
|                 | R50        | -1.586E-02 | 0.645 | -6.695 | -1.644  | 0.427       | 0.035       | 17.9 | -1.368E-02 | 0.513 | -4.871 | -1.081      | 0.389     | 1.268     | 3.4 |
|                 | R101       | -8.479E-02 | 0.650 | -6.678 | -1.637  | 0.430       | 0.121       | 18.2 | 1.456E-01  | 0.569 | -4.822 | -1.087      | 0.416     | 1.360     | 3.7 |
|                 | X101-32x4d | -2.029E-01 | 0.647 | -6.681 | -1.600  | 0.427       | 0.171       | 18.5 | 6.097E-01  | 0.515 | -4.824 | -0.987      | 0.412     | 1.355     | 4.5 |
|                 | X101-64x4d | -9.568E-02 | 0.662 | -6.645 | -1.538  | 0.434       | 0.477       | 19.1 | 1.775E-01  | 0.541 | -4.857 | -0.628      | 0.412     | 1.383     | 4.2 |
| Sparse RCNN     | R50        | -2.382E+03 | 0.643 | -6.695 | -1.887  | 0.425       | 0.009       | 14.3 | 1.085E+04  | 0.652 | -4.905 | -1.803      | 0.402     | 1.252     | 3.7 |
|                 | R101       | 4.137E+02  | 0.653 | -6.683 | -1.891  | 0.429       | 0.190       | 14.2 | 1.153E+04  | 0.613 | -4.889 | -2.000      | 0.392     | 1.204     | 3.8 |
| Deformable DETR | R50        | 4.226E+05  | 0.614 | -5.226 | -1.435  | 0.476       | 15.536      | 23.3 | 8.210E+04  | 0.660 | -4.327 | -2.108      | 0.425     | 1.307     | 2.8 |
| Faster RCNN OI  | R50        | -2.383E+00 | 0.614 | -6.401 | -2.036  | 0.434       | 3.037       | 20.2 | 1.880E+00  | 0.656 | -4.772 | -5.944      | 0.373     | 0.820     | 2.5 |
| RetinaNet OI    | R50        | -8.290E-01 | 0.630 | -6.627 | -1.792  | 0.425       | 1.077       | 16.3 | -3.031E-01 | 0.655 | -4.784 | -2.507      | 0.375     | 1.105     | 3.1 |
| SoCo            | R50        | -1.907E+01 | 0.612 | -6.568 | -1.656  | 0.427       | 3.065       | 20.6 | -2.707E+00 | 0.676 | -4.781 | -3.650      | 0.391     | 1.068     | 2.3 |
| InsLoc          | R50        | -7.507E-02 | 0.540 | -6.625 | -0.925  | 0.417       | 0.690       | 18.8 | -1.149E-02 | 0.496 | -4.895 | 1.239       | 0.388     | 1.452     | 0.5 |
| UP-DETR         | R50        | -4.091E+02 | 0.428 | -6.851 | -1.341  | 0.345       | 0.062       | 13.5 | -5.645E+03 | 0.217 | -5.985 | -4.089      | 0.134     | 0.167     | 0.4 |
| DETRReg         | R50        | -1.594E+02 | 0.419 | -5.978 | -1.963  | 0.367       | 5.498       | 15.1 | -8.055E+03 | 0.411 | -5.119 | -4.957      | 0.272     | 0.562     | 2.0 |
| $\tau_w$        |            | 0.16       | 0.53  | 0.52   | 0.14    | <b>0.71</b> | <b>0.71</b> | N/A  | -0.14      | -0.30 | 0.13   | <b>0.61</b> | -0.09     | 0.50      | N/A |

[4] Stephen F. Gull. *Developments in Maximum Entropy Data Analysis*, pages 53–71. Springer Netherlands, Dordrecht, 1989. 1

[5] Kevin H Knuth, Michael Habeck, Nabin K Malakar, Asim M Mubeen, and Ben Placek. Bayesian evidence and model selection. *Digital Signal Processing*, 47:50–67, 2015. 1

[6] Daphne Koller and Nir Friedman. *Probabilistic graphical models: principles and techniques*. MIT press, 2009. 1

[7] Yandong Li, Xuhui Jia, Ruoxin Sang, Yukun Zhu, Bradley Green, Liqiang Wang, and Boqing Gong. Ranking neural checkpoints. In *Proceedings of the IEEE/CVF Conference on Computer Vision and Pattern Recognition*, pages 2663–2673, 2021. 4

[8] Adam Paszke, Sam Gross, Francisco Massa, Adam Lerer, James Bradbury, Gregory Chanan, Trevor Killeen, Zeming Lin, Natalia Gimelshein, Luca Antiga, et al. Pytorch: An imperative style, high-performance deep learning library. *Advances in neural information processing systems*, 32, 2019. 1

[9] Shaoqing Ren, Kaiming He, Ross Girshick, and Jian Sun. Faster r-cnn: Towards real-time object detection with region proposal networks. *Advances in neural information processing systems*, 28, 2015. 1

[10] Shuai Shao, Zijian Zhao, Boxun Li, Tete Xiao, Gang Yu, Xiangyu Zhang, and Jian Sun. Crowdhuman: A benchmark for detecting human in a crowd. *arXiv preprint arXiv:1805.00123*, 2018. 2

[11] Wenqi Shao, Xun Zhao, Yixiao Ge, Zhaoyang Zhang, Lei Yang, Xiaogang Wang, Ying Shan, and Ping Luo. Not all models are equal: Predicting model transferability in a self-challenging fisher space. *European Conference on Computer Vision*, 2022. 1

[12] Jingjing Xu, Liang Zhao, Junyang Lin, Rundong Gao, Xu Sun, and Hongxia Yang. Knas: green neural architecture search. In *International Conference on Machine Learning*, pages 11613–11625. PMLR, 2021. 1

[13] Shuo Yang, Ping Luo, Chen-Change Loy, and Xiaoou Tang. Wider face: A face detection benchmark. In *Proceedings of the IEEE conference on computer vision and pattern recognition*, pages 5525–5533, 2016. 2

[14] Kaichao You, Yong Liu, Jianmin Wang, and Mingsheng Long. Logme: Practical assessment of pre-trained models for transfer learning. In *International Conference on Machine Learning*, pages 12133–12143. PMLR, 2021. 1
